1 Macro-to-nano scale investigation of wall-plate joints in the acorn barnacle  
2 *Semibalanus balanoides*: correlative imaging, biological form and function, and  
3 bioinspiration

4

5 *Mitchell, R.L.<sup>1\*</sup>, Coleman, M.<sup>1</sup>, Davies, P.<sup>1</sup>, North, L.<sup>1</sup>, Pope, E.C.<sup>2</sup>, Pleydell-Pearce, C.<sup>1</sup>,*  
6 *Harris, W.<sup>3</sup>, and Johnston, R.<sup>1\*</sup>.*

7 <sup>1</sup> Advanced Imaging of Materials (AIM) Facility, College of Engineering, Swansea  
8 University, Swansea, SA1 8EN, UK.

9 <sup>2</sup>Department of Biosciences, Swansea University, Swansea, SA2 8PP, UK.

10 <sup>3</sup> Carl Zeiss Microscopy, Pleasanton, CA, USA.

11

12 \*Co-corresponding authors

13

14 Keywords: Bioinspiration; biomimicry; Barnacles; Correlative Imaging; X-ray Microscopy

15 ORCID: RLM 0000-0002-6328-3998; MC 0000-0002-4628-1077; LN 0000-0001-9058-  
16 5871; ECP 0000-0001-5781-5575; RJ 0000-0003-1977-6418

## 17 **1. Abstract**

18 Correlative imaging combines information from multiple modalities (physical-chemical-  
19 mechanical properties) at various length-scales (cm to nm) to understand complex biological  
20 materials across dimensions (2D-3D). Here, we have used numerous coupled systems: X-ray  
21 microscopy (XRM), scanning electron microscopy (SEM), electron backscatter diffraction  
22 (EBSD), optical light microscopy (LM), and focused-ion beam (FIB-SEM) microscopy to  
23 ascertain the microstructural and crystallographic properties of the wall-plate joints in the

24 barnacle *Semibalanus balanoides*. The exoskeleton is composed of six interlocking wall-  
25 plates, and the interlocks between neighbouring plates (alae) allow barnacles to expand and  
26 grow whilst remaining sealed and structurally strong. Our results indicate that the ala contain  
27 functionally-graded orientations and microstructures in their crystallography, which has  
28 implications for naturally functioning microstructures, potential natural strengthening, and  
29 preferred oriented biomineralisation. Elongated grains at the outer edge of the ala are oriented  
30 perpendicularly to the contact surface, and the c-axis rotates with the radius of the ala.  
31 Additionally, we identify for the first time three-dimensional nano-scale ala pore networks  
32 revealing that the pores are only visible at the tip of the ala, and that pore thickening occurs  
33 on the inside (soft-bodied) edge of the plates. The pore networks appear to have the same  
34 orientation as the oriented crystallography, and we deduce that the pore networks are  
35 probably organic channels and pockets which are involved with the biomineralisation  
36 process. Understanding these multi-scale features contributes towards an understanding of the  
37 structural architecture in barnacles, but also their consideration for bioinspiration of human-  
38 made materials. The work demonstrates that correlative methods spanning different length-  
39 scales, dimensions and modes enable the extension of structure-property relationships in  
40 materials to form and function of organisms.

41

## 42 **2. Introduction**

43 Biomaterialised organisms show an incredible diversity of complex microstructural forms  
44 and structure-property relationships [1–6]. A more complete realisation of these naturally-  
45 occurring structures provides not only a better understanding of an animal’s ecology[7–10],  
46 but also supports bioinspired development of human-made materials [11–16]. Acorn  
47 barnacles (order Sessilia) are sessile marine arthropods that often inhabit the high-energy

48 intertidal zone and have adapted structurally, compositionally, and architecturally to  
49 challenging abiotic conditions, as well as the threat of diverse predators [17]. The calcareous  
50 exoskeleton (shell) of barnacles is well-studied structurally; for example the specific calcite  
51 crystal orientations in the operculum of *Balanus amphritrite* (= *Amphibalanus amphitrite*;  
52 [18,19]); the high mechanical strength and adhesive properties of the baseplate in *A.*  
53 *amphitrite*, *A. reticulatus* and *B. tintinnabulum* ([9,20–23]); the involvement of extracellular  
54 matrix molecules in exoskeleton biomineralisation in the giant barnacle *Austromegabalanus*  
55 *psittacus* [24]; and the structurally-sound nanomechanical properties of the exoskeleton of *A.*  
56 *reticulatus* [25]. However, little is understood about how macro-micro-nano-scale structures,  
57 particularly in the shell, are linked. Correlative imaging provides an opportunity to discover  
58 the multi-scale interactions and mechanisms involved in the structure of complex systems at  
59 varying length scales [26–29], and specifically for barnacles, provides an opportunity to  
60 correlate optical, analytical, structural, and mechanical information [30] for the first time.  
61 Here, we have coupled numerous systems at various length scales: X-ray microscopy,  
62 scanning electron microscopy, light microscopy, and focussed ion-beam microscopy to  
63 ascertain the macro-to-nanoscale structure, crystallographic orientation and mechanical  
64 properties of wall plate joints in the parietal exoskeleton of the barnacle *Semibalanus*  
65 *balanoides*.

66 *S. balanoides* is the commonest intertidal barnacle on British coastlines [31] commonly  
67 outcompeting other barnacle genera [7], although the structural properties of its shell are  
68 relatively poorly understood compared to other species (e.g., *B. amphritrite*), as are the  
69 morphological properties of the wall-plate joints, with just two previous studies outlining  
70 basic details [7,17]. The shell of *S. balanoides* comprises six interlocking joints, where the  
71 shell originates from within an existing organic cuticle. These joints are located in a  
72 particularly active and dynamic region of the barnacle shell and provide a waterproof seal and

73 structural integrity in the face of extreme conditions of the physically harsh intertidal zone  
74 [8]. This work identifies specific macro-micro-nano features of the wall-plate joints in both  
75 2D and 3D through connected correlative imaging and establishes how these features are  
76 linked at varying length scales. A greater understanding of how these complex structures  
77 function provides valuable biomechanical information for biologists as well as the broader  
78 bioinspiration topic.

79

### 80 **3. Methods**

#### 81 *3.1. Barnacle (*Semibalanus balanoides*) structure*

82 Acorn barnacles are sessile organisms that attach to hard substrates via either a  
83 calcified base plate or an organic membrane [20], and biomineralisation of the calcareous  
84 shell is mediated by the mantle epithelium via secretion of a calcium matrix [32]. The  
85 conical-shaped exoskeleton is composed of four, six, or eight wall-plates depending on the  
86 species [25] which overlap at sutures, or joints (figure 1a); parts of the plate overlapping  
87 internally are called alae ('wings'), and parts that overlap externally are called radii ('rims'  
88 [33]; figure 1b). The wall plates grow both upwards towards the apex and outwards as the  
89 internal soft-bodied organism grows inside [20]. As with other crustaceans, barnacles moult  
90 the chitinous exoskeleton surrounding their main body periodically to grow, but the  
91 calcareous shell is not shed during this process [33].

92

#### 93 *3.2. Sample and preparation*

94 Barnacle specimens were collected from the intertidal region at Bracelet Bay, Swansea,  
95 UK (51.5660° N, 3.9801° W). Samples were subsequently vacuum impregnated into a  
96 32mm-wide resin block and ground and polished to reveal a transverse section. The sample

97 surface was coated with a 10nm layer of carbon to ensure sample conductivity in the SEM  
98 and FIB-SEM. Individual plates were also detached from the exoskeleton and attached with  
99 adhesive to wooden pins for imaging using XRM. All preparation, subsequent analysis and  
100 imaging occurred within the Advanced Imaging of Materials (AIM) Facility within the  
101 College of Engineering at Swansea University (UK).

102

### 103 *3.3. Imaging and analysis*

#### 104 *3.3.1. Light microscopy (LM) and Scanning Electron Microscopy (SEM)*

105 LM and SEM were used to obtain general 2D information on barnacle morphology.  
106 LM images were obtained using a Zeiss SmartZoom and a Zeiss Observer Z1M inverted  
107 metallographic microscope. SEM images were collected on a Carl Zeiss EVO LS25 with a  
108 backscatter detector at 15kV, 750pA, and a working distance of 10mm. As well as the carbon  
109 coating, copper tape and silver paint were added to the sample surface to aid charge  
110 dissipation.

111

#### 112 *3.3.2. Electron Backscatter Diffraction (EBSD)*

113 A JEOL 7800F FEGSEM and a NordlysNano EBSD detector controlled via Aztec  
114 (Oxford Instruments) software were used to obtain crystallographic information. The phase  
115 selected for EBSD indexing was Calcite [34] and patterns were collected at 15kV with a step  
116 size of 0.2 $\mu$ m. A relatively high number of frames (5 frames per pattern) were collected using  
117 4 x 4 binning to give a camera pixel resolution of 336 x 256 pixels and a speed of 8 Hz.

118

#### 119 *3.3.3. X-ray micro Computed Tomography/Microscopy (XRM)*

120 A Zeiss Xradia Versa 520 (Carl Zeiss XRM, Pleasanton, CA, USA) was used to carry  
121 out high resolution X-ray microscopy (XRM) non-destructive imaging; this was achieved  
122 using a CCD detector system with scintillator-coupled visible light optics and a tungsten  
123 transmission target. Initial scans of the barnacle region block were undertaken with an X-ray  
124 tube voltage of 130 kV and a tube current of 89  $\mu$ A, and an exposure of 4000 ms. A total of  
125 1601 projections were collected. A filter (LE4) was used to filter out lower energy X-rays,  
126 and an objective lens giving an optical magnification of 4 was selected with binning set to 2,  
127 producing an isotropic voxel (3D pixel) size of 3.45 $\mu$ m. The tomograms were reconstructed  
128 from 2D projections using a Zeiss Microscopy commercial software package  
129 (XMReconstructor), and an automatically generated cone-beam reconstruction algorithm  
130 based on filtered back-projection. Individual plates were also scanned (not in the resin  
131 block); these were collected using the 4X objective lens at 60kV and 84 $\mu$ A, with an exposure  
132 time of 12000 ms and a resulting (isotropic voxel size) of 0.5  $\mu$ m. A filter (LE1) was used to  
133 filter out low energy X-rays, and 1601 projections were collected. The scout and zoom  
134 methodology was used to create high resolution regions of interest within the sutures.

135

### 136 *3.4. Correlative Microscopy (Zeiss Microscopy Atlas 5/3D)*

137 Targeted navigation to regions of interest was achieved using Zeiss Microscopy  
138 correlative Atlas 5 (3D) software package on the Zeiss Crossbeam 540 FIB-SEM. This  
139 method enables a live 2D SEM view to be combined with other data and information from  
140 previous sessions or relevant characterisation techniques on the same area or volume of  
141 interest; this is achieved by importing and aligning other 2D datasets (e.g., LM images,  
142 EBSD maps) and 3D data (XRM stacks) to accurately correlate and locate regions of interest  
143 for further nano-scale imaging and characterisation (figure 2). Initial overlay is achieved by

144 manually aligning the live SEM image with the imported data, and ‘locking in’ the imported  
145 data to the current SEM coordinate system. This correlative microscopy approach is  
146 especially useful when regions of interest may be internally located within a subsurface area  
147 of the specimen, and allows samples to be accurately studied at varying length-scales by  
148 combining information from multi-modal sources.

149

#### 150 *3.4.1. Focussed Ion Beam Microscopy (FIB-SEM)*

151 Specific regions of interest in the barnacle shell were studied using a Zeiss Crossbeam  
152 540 Focussed Ion Beam Scanning Electron Microscope (FIB-SEM, Gallium source; Carl  
153 Zeiss Microscopy, Oberkochen, Germany). The sample stage was tilted to 54° to allow the  
154 sample to be perpendicular to the FIB column; the ion beam energy was 30kV in all cases.  
155 The FIB and SEM beams are then aligned at 5mm working distance at the co-incidence point.  
156 Within the Atlas 5 (3D) correlative workspace it is possible to identify regions of interest for  
157 further study, and then with the same interface prepare and collect 3D nanotomographic  
158 volumes (figure 3). A template is set up over the region of interest which outlines the  
159 numerous steps in the milling process (figure 3 *a*). A 10 x 10µm platinum layer was  
160 deposited using a gas injection system and the 700pA FIB probe; this is to protect the ROI  
161 sample surface from damage during the milling process. 3D tracking marks (which enable  
162 automatic alignment and drift correction during an automated run) are milled onto the first  
163 platinum pad using the 50 pA FIB probe, and then a second platinum pad is deposited on top  
164 (again at 700pA) creating a ‘sandwich’ of protection and alignment layers (figure 3 *b*). A  
165 trench is then milled using the 7nA probe to create a cross sectional surface through the  
166 region of interest to a depth of ~15 µm (figures 3 *b*, *c*). The cross-sectional surface of the  
167 trench is polished using the 700pA probe. Once the sample preparation is complete,

168 automated tomographic milling and slice generation can take place (figure 3 *c*). The run is set  
169 so the length of the protected platinum pad is milled to create a 3D volume. Each slice (10nm  
170 thickness) is milled by the 1.5nA probe using the FIB and simultaneously imaged by the  
171 SEM; parameters for image acquisition with the SESI detector include 1.8kV, 300pA, 10  $\mu$ s  
172 dwell time and a 12nm pixel size. Once the run has completed overnight (~8 hours), the slice  
173 images are reconstructed to create a 3D volume (figure 3 *d*), and segmented and visualised  
174 via other specialised tomographic software (e.g. FEI Avizo, Hillsboro, USA; ORS Dragonfly,  
175 Montreal, Canada). Quantified data can be found in *supplementary material 1*.

176

## 177 **4. Results**

### 178 *4.1. 2D ala morphology and crystallography (SEM and EBSD)*

179 SEM reveals the micro-scale 2D morphology of the barnacle (and specifically the alae;  
180 figure 4). Alae generally have rounded tips and slot into a groove in the neighbouring plate  
181 with organic material separating the two plates (figure 4 *a-d*). The microstructure in the 40-70  
182  $\mu$ m closest to the tip of the ala appears to have a different morphological texture and more  
183 voids than other alae regions and the opposing plate (figures 4 *c, d*). The voids are of two  
184 types; transverse banding which is parallel to the ala tip orientation, and elongated  
185 grooves/channels, which are perpendicular to this (figure 4 *c, d*). The elongated  
186 grooves/channels and transverse banding appear to be of varying size, shape, elongation and  
187 thickness (figures 4 *c, d*) and may represent pore networks. In contrast, the neighbouring  
188 plate and the area behind the ala tip appear smooth and featureless (figure 4 *c, d*).

189 EBSD inverse pole figure maps of the ala tips show a microstructure with a highly-  
190 segregated bimodal grain size (figures 4 *e, f*). The grains at the tip of the ala closest to the  
191 plate joint are elongated and radiate 50 - 70 $\mu$ m downward into the ala structure perpendicular



192 to the curve of the join (figures 4 *e, f*). The individual 3D hexagonal crystal diagrams for each  
193 elongated grain show that in each case the c-axis [0001] is parallel to the long axis of the  
194 grain and perpendicular to the line of the join of the plates (figures 4 *e, f*). The grains in the  
195 adjacent area below the elongated grains, and in the adjoining upper plate, are around 10-20  
196 times smaller at 3 - 5 $\mu$ m, and have a more equiaxed structure with no obvious texture. In both  
197 EBSD images there are also regions of coarser grains within the equiaxed areas behind the  
198 ala tip on the inside-facing edge of the ala (blue arrow; figure 4 *e*), however these are not  
199 elongate or organised like those in the tip (figure 4 *e, f*).

200

#### 201 *4.2. 3D ala morphology and porous networks (XRM and analysis)*

202 We have reconstructed the entire barnacle in 3D (figure 5 *a*; *supplementary material 2*) as  
203 well as individual plates (figure 5 *b*) illustrating morphological variations in the ala through  
204 the length of the exoskeleton. We observe the protruding ‘tab’ of the ala towards the apex  
205 where it slots in to the neighbouring plate (figure 5 *a ii*); in 2D image slices (figure 5 *a iii, iv*),  
206 the ala appears as a finger-like protrusion with a rounded tip. Towards the base and the ala  
207 sutural edge, the ala recesses, and creates a flat junction with the neighbouring plate (figure 5  
208 *a ii*); in 2D the ala appears more angular and has an almost square tip (figure 5 *a ii, iv*). In  
209 addition to the 3D morphological change in the ala through its length, we also observe  
210 networks of elongate channels, grooves and bands that are also visible in the 2D surface  
211 imaging (figure 4 *c, d*). We propose that these are related to the pore networks observed in  
212 figure 5. Pores appear black in 2D stack images because they exhibit a lower X-ray  
213 attenuation compared with the surrounding calcium carbonate exoskeleton (figure 5 *a iii, iv*).  
214 The pores appear to ‘fan’ perpendicularly to the ala edge, the same as the textures in 2D  
215 (figures 4 *c, d*). The micropores are only found at the tip and are not present in other areas of

216 the ala. Pores also change shape, orientation and location through the length of the ala;  
217 towards the apex they fan around the entire ala tip (figure 5 *a iii*), however towards the ala  
218 sutural edge they are on one, inner side only (figure 5 *a iv*).

219 Segmentation of the pores using Intellesis machine learning segmentation software (Zeiss  
220 Microscopy, Oberkochen, Germany) reveals the morphology of pores in 3D through the  
221 length of the ala. Nearest the apex the pores form fan-like networks which continues down  
222 into the ala length (figure 5 *b i, ii*). However towards the ala sutural edge and base the  
223 morphology and orientation of the pores change, and are instead parallel to the ala surface  
224 running from top to bottom; a simplified diagram of this is seen in (figure 5 *b iv*). In addition,  
225 there is a widening of pores on the inside edge of the plate nearest the soft bodied organism  
226 (figure 5 *b iii*). Despite the identification of pores, no grain boundaries, crystal structure or  
227 segregated grayscale variations were observed via XRM imaging, therefore requiring further  
228 characterisation via other techniques (e.g., FIB-SEM, EBSD, SEM).

229

#### 230 *4.3. Pore nano-structure (FIB-SEM) and quantification*

231 From targeted FIB-SEM nano-tomographic milling through Atlas 5/3D (*section*  
232 *3.4.1*), it is possible to study the ala pore networks at a higher resolution to establish nano-  
233 scale features and relationships. We have compared ala pore networks with those on the  
234 opposing plate (figure 6) to establish exoskeleton variations in pore structure. 10 x 10  $\mu\text{m}$   
235 FIB-SEM nano-tomographic volumes reveal variations in pore morphology and alignment  
236 between those on the ala and those on the neighbouring plate (figure 6). Pores on the ala  
237 (figure 6 *d, e*) are numerous (962 in this volume), have pore diameters up to 1.56 $\mu\text{m}$ , and are  
238 composed of mostly shorter and singular pores. This is compared with those on the opposing  
239 plate (figure 6 *b, c*) which are less numerous (594 in this volume) and are dominated by

240 thicker and longer connected pores. Ala pore directionality (figure 6 *d, f*) follows EBSD  
241 crystallographic orientations (figure 4 *e, f*), however dominant orientations on the opposing  
242 plate (figure 6 *b, c*) do not appear to be related to crystallographic structure (figure 4 *e, f*).  
243 Further analysis to the porosities via Avizo software indicates similar trends in elongation  
244 and pore diameter between the opposing plate and the ala (figures 6 *f, i*), with a larger spread  
245 for values of pore width (figure 6 *h*) and more spherical pores (figure 6 *g*) in the ala. This  
246 illustrates that individual pores and pore networks vary in structure (and possibly function)  
247 across the barnacle shell. No crystal structure, crystal boundaries or phase variations were  
248 observed from FIB-SEM images.

249

## 250 **5. Discussion**

### 251 *5.1. Correlating multi-modal and multi-scale data/images*

252 This work represents the first correlative multi-modal and multi-scale study of barnacle  
253 morphological and mechanical structure across multiple dimensions. Correlative microscopy  
254 overcomes the multi-scale ‘needle in a haystack’ challenge of working in complex 3D  
255 volumes, and has proved successful for accurately locating specific regions of study in  
256 human-made materials; examples include lithium ion batteries [35] and corrosion in  
257 magnesium alloys [36]. Additionally, the technique is well established across a range of  
258 applications in the life sciences [37–40]. The advantage of using a multi-modal and  
259 correlative approach is that each specialised technique can provide information relating to a  
260 specific feature or structure, and that correlation across dimensions can thus inform how  
261 features and structures are linked, particularly in hierarchical materials. Increasing the  
262 resolution is important for identifying and improving the accuracy of measurement of  
263 features at the micro to nano-scale (e.g. the voids in figure 5 *b, 6*) and in three dimensions

264 reveals characteristics that might not be identifiable in one or two dimensions alone (e.g. pore  
265 orientations in figure 5).

266 The correlative workflow improves our understanding of barnacle shell structure (figures  
267 6, 7) where specific regions are accurately located to the nano-scale. The workflow outlined  
268 here can be utilised in other bioinspiration studies (e.g., mollusc shells) to correlate macro to  
269 nano-scale shell structures, which ultimately improves the understanding of form and  
270 function as well as application for human-made materials.

271

## 272 5.2. Crystallographic alignment with pores

273 This work reveals that the ala tips of *S. balanoides* exhibit a distinct crystallographically-  
274 graded biological material (figure 4). We propose the elongated crystal growth at the tip of  
275 the ala compared to the more equi-axed grains behind the tip and on the opposing plate  
276 (Figures 4 *e, f*) represent a growing front in a region of active biomineralisation. During  
277 biomineralisation, calcium carbonate generally forms prismatic, sheet nacreous, lenticular  
278 nacreous, foliated, cross-lamellar, and homogeneous crystal morphologies [41]. Only  
279 prismatic and homogeneous crystals were identified here in barnacles (figure 4 *e, f*).  
280 Elongated crystals in *Semibalanus* alae have previously been identified from a single study of  
281 *B. balanus* and *S. balanoides* [17] that was limited to two dimensional study (LM and SEM)  
282 and left their origins unexplained, and elongate crystals have been identified in *B. amphitrite*  
283 [19,21]. Different crystallographic orientations, in particular elongate, prismatic columns  
284 associated with organic materials are common in a variety of biomineralised molluscs  
285 [6,42,43] but remain largely unidentified in barnacles. The ordering of calcite in the scutum  
286 (one of the two plates that guard the apical opercular opening) is significantly disordered  
287 compared with the calcite in the wall-plates in *A. amphitrite* [19], and the calcitic

288 microcrystals in the wall plates of this species show almost no orientation [19,21] whilst  
289 those in the base plate of *A. amphitrite* shows some preferred alignment [21]. This suggests  
290 there may be some variations between barnacle genera other than *Semibalanus balanoides*.  
291 Elongated, prismatic calcite columns growing perpendicularly to the shell surface are present  
292 in shells of various molluscs (including oysters and scallops; [42,44]) and other arthropods  
293 (specifically the Mantis shrimp; [45]), which are surrounded by up to 3  $\mu\text{m}$ -thick organic  
294 membranes and vaterite columns in the shell of the bivalve *Corbicula fluminea* [6]. This  
295 indicates that different crystallographic orientations, in particular elongate, prismatic columns  
296 associated with organic materials are common in a variety of biomineralised molluscs,  
297 however remain largely unexplained and undescribed in barnacles and may form an  
298 important part of the shell structure. Several hypotheses, either independently or in union,  
299 may explain the crystallographic elongation at the tip of the ala in *S. balanoides*:

300 (1) Elongation could be related to the calcium carbonate polymorph that is being  
301 biomineralised (e.g., aragonite/vaterite/calcite) which may form specific  
302 morphologies [46]. Calcite is the most stable polymorph, with aragonite forming at  
303 high pressures and vaterite being thermodynamically unstable [46,47]. Extant  
304 barnacle shells are all reportedly dominated by calcite [4], but were all originally  
305 phosphatic [48,49]; only one extant species now uses calcium phosphate (*Ibla*  
306 *cumingi*; [50]) but a detailed study of variations within exoskeletons and between  
307 genera/species has never been undertaken. Changes in the form of calcium  
308 carbonate/calcium phosphate could impact the mechanical structure and integrity of  
309 different areas of the exoskeleton, and of barnacles of different  
310 chemistries/polymorphs. Some molluscs biomineralise aragonite instead of calcite in  
311 seawater rich in magnesium [46,51], so the specific habitat/latitude of different  
312 barnacles could also affect crystal structure and mechanical properties of the shell.

313 (2) The age/growth stage of the organism. The transverse banding forming  
314 perpendicularly to the elongate crystal orientation (figure 4 *c, d, 5 a*) is postulated by  
315 [17] to indicate variations in growth rate (like tree rings). Acorn barnacles such as *S.*  
316 *balanoides* grow by lengthening their side (wall) plates [20] and biomineralising the  
317 base of their exoskeleton in an incremental fashion [52]. Therefore, the transverse  
318 banding at the ala tip probably indicates incremental growth spurts and the  
319 perpendicular elongate crystals are younger than those biomineralised as smaller,  
320 more equiaxed grains (figure 4 *e, f*). [20] suggests crystallisation initiates at the  
321 leading edge of the barnacle base plate with the deposition of mutually aligned fine-  
322 grained calcite, which then acts as a template for the formation of subsequent coarser  
323 grains. A similar process may occur in the wall plates and alae of *S. balanoides*, with  
324 elongate crystals growing upon finer-grained granular calcite (figure 4 *e, f*). *S.*  
325 *balanoides* shows little growth after 1-2 years [17], however in our specimens it is  
326 unclear whether the barnacle was still growing or fully formed. Also unclear is  
327 whether the elongate ‘growth’ crystals are overprinted later in life. Comparably,  
328 molluscs biomineralise their shells continuously whereas barnacles do not [53],  
329 indicating that crystal growth in the barnacle occurs much quicker than molluscs,  
330 possibly leading to unique crystallographic configuration morphologies.

331 (3) Even though we do not see an obvious organic layer separating the tip of the ala from  
332 the neighbouring plate in this study (figure 4 *c, d*). [25] state that an organic layer  
333 between the two plates enables them to ‘stick’ together. This could be an important  
334 feature as organic material can promote biomineralization, crystallographic  
335 morphology and orientation, and ultimately contribute towards exoskeleton  
336 mechanical properties [4,42,54,55]. Biomineralised structures are not purely inorganic  
337 because they all contain some organic molecules within their structure [42] and

338 hydrogels often provide biological control on the construction of aligned calcium  
339 carbonate domains [19,20]. In many marine shell-producing organisms, the hydrogel  
340 slows grain motion enabling carbonate grains to orientate themselves relative to each  
341 other [20,47]. Indeed, the crystal properties and microstructure in *A. amphitrite* are  
342 consistent with those developing in a hydrogel-like environment and the  
343 intercrystalline organic matrix is a non-proteinaceous sulphate-rich polymer behaving  
344 like a hydrogel [19]. An organic matrix is presumed responsible for the organisation  
345 of exoskeleton biomineralisation in the giant barnacle *Austromegabalanus psittacus*  
346 where it controls the type, size and orientation of exoskeleton-forming crystals [53].  
347 Consequently, it could be inferred that organic matrices have an influential effect on  
348 biomineralisation in barnacles and might affect crystal shape and size, and through  
349 this the mechanical properties of the exoskeleton.

350

### 351 5.3. Pore networks represent organic channels and ‘pockets’?

352 We have identified and examined numerous porous channels in the barnacle alae. We  
353 considered ala pores may represent crystallographic boundaries (figure 4 *e, f*) as they have the  
354 same orientation (figure 6, *d, e*) however further study via FIB-SEM showed the pores sit  
355 within the grains (some crystals are up to 10µm wide, the same as the entire FIB-SEM  
356 volumes; figure 4 *e, f, 6 d*). This could be a factor of the EBSD resolution, however it is  
357 likely the pores exist independently of crystallographic structure whilst maintaining the same  
358 orientations. This hypothesis is supported by elongate pore networks in the more equi-axed  
359 crystals of the opposing plate and behind the ala tip (figure 6 *b*) and the lack of observed  
360 crystallography in the cross-section face during FIB-SEM milling (figure 5 *c*), suggesting that

361 the locations for FIB-SEM nanotomographic milling were small enough to be considered  
362 intragrain.

363 Exoskeleton/shell pores are common in many groups of biomineralised marine organisms  
364 including gastropods [56], bivalves [6,57], and within the exoskeleton of some barnacles  
365 (particularly in base plates; [25,50]). It has been suggested that the most important adaptive  
366 breakthrough in balanoid barnacles, and their competitive success over *Chthamalus*  
367 barnacles, is a tubiferous wall structure which enables fast exoskeletal growth and  
368 colonisation of free space [7]. We propose that the ala pores in the exoskeleton of *B.*  
369 *balanoides* are organic-rich areas, possibly involved in biomineralisation. The involvement of  
370 organic material in the biomineralisation of specific crystal structures and orientations could  
371 have a bearing on the function of the ala pores, and may represent channels/canals which hold  
372 or deliver biomineralisation products to specific areas of the exoskeleton. Organic  
373 membranes are known to influence the pattern of columnar prismatic layers in numerous  
374 mollusc shells [43], so it is possible that organic channels (or, ala pores) running through the  
375 barnacle structure contribute towards the delivery of and biomineralisation of calcium  
376 carbonate. The organic layer separating the ala tip and neighbouring plate may play a part in  
377 this. A layer of organic cuticle exists between the ala and neighbouring plate in *Balanus*  
378 *balanus* [17] which may explain the concentration of pores and elongated crystals near the ala  
379 tip. The pores, however, are not all elongate channels and some pores, particularly in the  
380 opposing plate, being more spherical in shape (figure 6 g). Pores in different parts of the  
381 exoskeleton may therefore have different functions, possibly acting as channels in the ala to  
382 deliver organic material for biomineralisation, and to hold pockets of organic material in the  
383 opposing plate.

384 Barnacle wall-plate mineralisation occurs through cell-mediated  $\text{Ca}^{2+}$  uptake, storage and  
385 mobilization to the mineralization front [32] and pore canals assist in transporting



386 components necessary for calcification (including  $\text{Ca}^{2+}$  and organic molecules). Voids/pores  
387 in the aragonitic platelets of mollusc nacre contain increased amounts of carbon [58] and  
388 tube-like shell pores containing organic material are also present in limpets [57] whilst the  
389 organic intertile layer in abalone is anchored by the growth of minerals through pores [59].  
390 The pores forming ‘canal’ networks in the wall plates of large sessile barnacles  
391 (*Austromegabalanus psittacus*; [24]) has yet to be ascribed a function. Longitudinal canals in  
392 the wall plates, and radial canals in the base plate of *B. amphitrite* are lined with mantle  
393 epithelium, and biomineralisation is facilitated by salt-rich secretions from the junction  
394 between the wall and base plates [32]. Some barnacles also possess microducts/pores in their  
395 base plates to facilitate secretion of adhesive [25]. Exoskeleton pores seem to be used for the  
396 transport of organic material and biomineralisation, although the role of proteins and other  
397 macromolecules in the biomineralisation process however is still poorly understood [19], and  
398 future studies should aim to quantify this.

399

#### 400 5.4. Variation in shell morphology in barnacles

401 Despite the presence of probable organic pore networks and specific crystallographic  
402 orientations in many genera and species of barnacle [17,24,25,29], it is possible the features  
403 discovered in this study are unique to *S. balanoides*. The alae and wall plates of other  
404 barnacles, for example *B. balanus*, are considerably different to those of *S. balanoides* [17],  
405 consequently their crystallographic structures may also differ. Shell morphology is also  
406 highly phenotypically plastic within a barnacle species and can change according to wave  
407 exposure [60], predation [61], and, especially, crowding [62]. Hummocks of tall, columnar  
408 barnacles are common under high population densities whilst squat, conical growth forms  
409 with much thicker (2-5 times in *S. balanoides*) walls dominate in solitary individuals or low  
410 population densities [62]. Whether these growth forms differ in microstructural and

411 mechanical properties may warrant investigation, although the substantial difference in shell  
412 strength between *B. balanus* and *S. balanoides* has been attributed to distinct variation in  
413 shell architecture rather than mechanical properties of the wall plates [17].

414

#### 415 *5.5. Implications for mechanical strength and bioinspiration*

416 The range of crystal sizes and shapes, as well as reinforcement by organic-rich channels,  
417 will all contribute to the mechanical properties of the barnacle shell. For example, the  
418 probable organic pores and specifically oriented crystallographic structure of the ala tip may  
419 also act as a strengthening mechanism in a region of active growth [20] and high stress  
420 [60,61]. The presence of organic material within the biomineralised structure also has  
421 important implications for strength and toughness. Crossed-lamellar structures, composed of  
422 aragonite and a small amount of organic material, are the most common microstructures in  
423 mollusc shells and possess a fracture toughness and elasticity much higher than pure  
424 carbonate (calcite) mineral [58,63–66]. Indeed, removal of this organic material from abalone  
425 shell greatly contributes towards its mechanical decline [67]. The ala in *S. balanoides* is non-  
426 geometric through its length (figures 1, 5 *a-b*; [17]) suggesting it is potentially not the  
427 strongest design for an interlocking joint. Further tests are required to establish the hardness  
428 and strength of different regions of the barnacle, in particular, the alae, and the effect the  
429 elongated crystal structure and organic-rich pores of specific orientations have on mechanical  
430 strength.

431 Understanding the morphology and structure of biomaterials can contribute towards the  
432 design and manufacture of human-made materials [2,68,69]. Similar discrete bimodal grain  
433 sizes are observed in manufactured materials for aerospace, such as the ‘dual microstructure’  
434 of some nickel superalloy-based gas turbine disks [70]. To improve the material properties

435 and in-service behaviour, the material is specifically designed to have distinct microstructures  
436 in different regions of the disk. A fine-grained microstructure is produced in the bore,  
437 providing a higher proof strength and fatigue life; whereas a coarse-grained microstructure in  
438 the rim results in greater creep life [71]. Location-specific microstructures in different regions  
439 of the part are tuned to the environmental conditions in which they are exposed for optimised  
440 design and life. But this level of modification to different parts of the microstructure requires  
441 multiple complex steps, including heat treatments at temperatures in excess of 650°C [72]. It  
442 is possible the barnacle alae dual microstructure with specific crystallographic orientation of  
443 the elongated grains perpendicular to the loading/contact surface is a functional characteristic,  
444 with highly adapted microstructural features driven by evolutionary processes. In comparison  
445 to the processes required to produce the nickel superalloy, the barnacle achieves a highly-  
446 complex microstructure in ambient conditions, dynamic tidal conditions, and with the  
447 chemistry and temperatures imposed on it by the environment.

448         Additionally, the interlocking nature of the barnacle joints described here, combined  
449 with the variation in crystallographic organisation and pore structure, could contribute  
450 towards the development of materials that require movement and expansion whilst remaining  
451 strong, such as expandable pressurised containers or submersible structures. Another  
452 potential could be the utilisation of barnacle-like designs in additive manufacturing. In recent  
453 years Functionally Graded Additive Manufacturing (FGAM) has developed its capabilities of  
454 fabricating materials layer by layer and by controlling morphological features (such as  
455 porosity) to create structurally and mechanically distinctive materials [73]. A correlative  
456 approach to understanding the morphological, chemical, and structural characteristics of  
457 natural biomaterials outlined in this study could therefore contribute greatly to the  
458 development of future bioinspired materials.

459

## 460 **6. Conclusions**

461 Here we show the advantages of using multi-modal, multi-dimensional and multi-scale  
462 correlative microscopy techniques to identify the morphological, microstructural, and  
463 crystallographic properties of the shell of the barnacle *S. balanoides*. The barnacle shell is  
464 composed of six interlocking calcium carbonate wall-plates with alae (*supplementary*  
465 *material 2*), finger-like protrusions acting as a contact point of potential high stress for the  
466 joining of adjacent plates. 2D imaging via LM and SEM indicate that the tip of the ala  
467 contains a series of pores, and from EBSD we illustrate the crystallographically-graded  
468 texture of the biomineralised calcium carbonate, with the elongated grains at the outer edge  
469 of the ala oriented perpendicularly to the contact surface of the joint, and the c-axis rotated  
470 with the radius of the ala; the same orientation as the pores. 3D imaging via XRM enables the  
471 segmentation of the pores, and the realisation that pores are only visible within the very tip of  
472 the ala, their orientations change through its length, and there is pore thickening on the inside  
473 (soft bodied) edge of the plate. Further analysis of the nano-scale structure of the pores  
474 through FIB-SEM illustrate that the pores are probably organic channels and pockets which  
475 are involved with the biomineralisation process. These properties indicate the macro-micro-  
476 nano scale features of the barnacle exoskeleton, particularly at the ala, could be useful for  
477 bioinspiration for human-made materials. Furthermore, correlative imaging allows the  
478 targeting of specific regions of interest across different imaging techniques and length scales,  
479 and greatly increases the amount of information that can be acquired from imaging in purely  
480 two dimensions, bridging the materials science of structure-property relationships with the  
481 biological form and function.

482

## 483 **7. Acknowledgements**

484 We thank two anonymous reviewers for insightful reviews and comments on this manuscript.  
485 Additional thanks go to James Russell and Imogen Woodhead for aid during SEM imaging  
486 and preliminary pore analysis respectively, both from Swansea University, and Tobias  
487 Volkenandt and Stefanie Freitag from Carl Zeiss Microscopy (Germany).

## 488 **8. Funding**

489 Authors acknowledge AIM Facility funding in part from EPSRC (EP/M028267/1), the  
490 European Regional Development Fund through the Welsh Government (80708), the Ser Solar  
491 project via Welsh Government, and from Carl Zeiss Microscopy.

## 492 **9. Data accessibility**

493 Supplementary material (1-4) can be found at [X](#). XRM scans (tiff stacks) of whole barnacles  
494 mounted in resin and individual plate can be found at [X](#) (will be Dryad repository).

495

## 496 **10. References**

- 497 1. Albéric M, Bertinetti L, Zou Z, Fratzl P, Habraken W, Politi Y. 2018 The  
498 Crystallization of Amorphous Calcium Carbonate is Kinetically Governed by Ion  
499 Impurities and Water. *Adv. Sci.* **5**. (doi:10.1002/advs.201701000)
- 500 2. North L, Labonte D, Oyen ML, Coleman MP, Caliskan HB, Johnston RE. 2017  
501 Interrelated chemical-microstructural-nanomechanical variations in the structural units  
502 of the cuttlebone of *Sepia officinalis*. *APL Mater.* **5**, 116103. (doi:10.1063/1.4993202)
- 503 3. Gal A, Kahil K, Vidavsky N, Devol RT, Gilbert PUPA, Fratzl P, Weiner S, Addadi L.  
504 2014 Particle accretion mechanism underlies biological crystal growth from an  
505 amorphous precursor phase. *Adv. Funct. Mater.* **24**, 5420–5426.  
506 (doi:10.1002/adfm.201400676)

- 507 4. Astachov L, Nevo Z, Brosh T, Vago R. 2011 The structural, compositional and  
508 mechanical features of the calcite shell of the barnacle *Tetraclita rufotincta*. *J. Struct.*  
509 *Biol.* **175**, 311–318. (doi:10.1016/j.jsb.2011.04.014)
- 510 5. Ma Y *et al.* 2009 The grinding tip of the sea urchin tooth exhibits exquisite control  
511 over calcite crystal orientation and Mg distribution. *Proc. Natl. Acad. Sci.* **106**, 6048–  
512 6053. (doi:10.1073/pnas.0810300106)
- 513 6. Frenzel M, Harrison RJ, Harper EM. 2012 Nanostructure and crystallography of  
514 aberrant columnar vaterite in *Corbicula fluminea* (Mollusca). *J. Struct. Biol.* **178**, 8–  
515 18. (doi:10.1016/j.jsb.2012.02.005)
- 516 7. Stanley SM, Newman WA. 1980 Competitive exclusion in evolutionary time: the case  
517 of the acorn barnacles. *Paleobiology* **6**, 173–183.
- 518 8. Tomanek L, Helmuth B. 2002 Physiological Ecology of Rocky Intertidal Organisms:  
519 A Synergy of Concepts. *Integr. Comp. Biol.* **42**, 771–775. (doi:10.1093/icb/42.4.771)
- 520 9. Burden DK, Spillmann CM, Everett RK, Barlow DE, Orihuela B, Deschamps JR,  
521 Fears KP, Rittschof D, Wahl KJ. 2014 Growth and development of the barnacle  
522 *Amphibalanus amphitrite*: time and spatially resolved structure and chemistry of the  
523 base plate. *Biofouling* **30**, 799–812. (doi:10.1080/08927014.2014.930736)
- 524 10. R.M.O’Riordan, Power AM, Myers AA. 2010 Factors, at different scales, affecting the  
525 distribution of species of the genus *Chthamalus ranzani* (Cirripedia, Balanomorpha,  
526 Chthamaloidea). *J. Exp. Mar. Bio. Ecol.* **392**, 46–64.
- 527 11. du Plessis A, Broeckhoven C. 2019 Looking deep into nature: A review of micro-  
528 computed tomography in biomimicry. *Acta Biomater.* **85**, 27–40.  
529 (doi:10.1016/j.actbio.2018.12.014)

- 530 12. Nakamura K, Hisanaga T, Fujimoto K, Nakajima K, Wada H. 2018 Plant-inspired  
531 pipettes. *J. R. Soc. Interface* **15**, 20170868. (doi:10.1098/rsif.2017.0868)
- 532 13. Cutkosky MR. 2015 Climbing with adhesion: From bioinspiration to  
533 biounderstanding. *Interface Focus* **5**, 20150015. (doi:10.1098/rsfs.2015.0015)
- 534 14. Porter MM, Imperio R, Wen M, Meyers MA, McKittrick J. 2014 Bioinspired scaffolds  
535 with varying pore architectures and mechanical properties. *Adv. Funct. Mater.* **24**,  
536 1978–1987. (doi:10.1002/adfm.201302958)
- 537 15. Barthelat F. 2007 Biomimetics for next generation materials. *Philos. Trans. R. Soc. A*  
538 *Math. Phys. Eng. Sci.* **365**, 2907–2919. (doi:10.1098/rsta.2007.0006)
- 539 16. Ripley RL, Bhushan B. 2016 *Bioarchitecture: Bioinspired art and architecture-a*  
540 *perspective*. (doi:10.1098/rsta.2016.0192)
- 541 17. Murdock GR, Currey JD. 1978 Strength and design of shells of the two ecologically  
542 distinct barnacles, *Balanus balanus* and *Semibalanus (Balanus) balanoides*  
543 (Cirripedia). *Biol. Bull.* **155**, 169–192.
- 544 18. Clare AS, Høeg JT. 2008 *Balanus amphitrite* or *Amphibalanus amphitrite*? A note on  
545 barnacle nomenclature. *Biofouling* **24**, 55–57. (doi:10.1080/08927010701830194)
- 546 19. Khalifa GM, Weiner S, Addadi L. 2011 Mineral and matrix components of the  
547 operculum and shell of the barnacle *Balanus amphitrite*: Calcite crystal growth in a  
548 hydrogel. *Cryst. Growth Des.* **11**, 5122–5130. (doi:10.1021/cg2010216)
- 549 20. De Gregorio BT, Stroud RM, Burden DK, Fears KP, Everett RK, Wahl KJ. 2015 Shell  
550 Structure and Growth in the Base Plate of the Barnacle *Amphibalanus amphitrite*. *ACS*  
551 *Biomater. Sci. Eng.* **1**, 1085–1095. (doi:10.1021/acsbiomaterials.5b00191)
- 552 21. Lewis AC, Burden DK, Wahl KJ, Everett RK. 2014 Electron Backscatter Diffraction

- 553 (EBSD) study of the structure and crystallography of the barnacle *Balanus amphitrite*.  
554 *J. Miner. Met. Mater. Soc.* **66**, 143–148. (doi:10.1007/s11837-013-0793-y)
- 555 22. Sangeetha R, Kumar R, Venkatesan R, Doble M, Vedaprakash L, Kruparatnam,  
556 Lakshmi K, Dineshram. 2010 Understanding the structure of the adhesive plaque of  
557 *Amphibalanus reticulatus*. *Mater. Sci. Eng. C* **30**, 112–119.  
558 (doi:10.1016/j.msec.2009.09.007)
- 559 23. Hui CY, Long R, Wahl KJ, Everett RK. 2011 Barnacles resist removal by crack  
560 trapping. *J. R. Soc. Interface* **8**, 868–879. (doi:10.1098/rsif.2010.0567)
- 561 24. Fernandez MS, Vergara I, Oyarzum A, Arias JI, Rodriguez R, Wiff JP, Fuenzalida  
562 VM, Arias JL. 2002 Extracellular Matrix Molecules Involved in Barnacle Shell  
563 Mineralization. *Mater. Res. Soc. Symp. Proc.* **724**, 1–9.
- 564 25. Raman S, Kumar R. 2011 Construction and nanomechanical properties of the  
565 exoskeleton of the barnacle, *Amphibalanus reticulatus*. *J. Struct. Biol.* **176**, 360–369.  
566 (doi:10.1016/j.jsb.2011.08.015)
- 567 26. Slater TJA, Bradley RS, Bertali G, Geurts R, Northover SM, Burke MG, Haigh SJ,  
568 Burnett TL, Withers PJ. 2017 Multiscale correlative tomography: An investigation of  
569 creep cavitation in 316 stainless steel. *Sci. Rep.* **7**, 1–10. (doi:10.1038/s41598-017-  
570 06976-5)
- 571 27. Daly M, Burnett TL, Pickering EJ, Tuck OCG, Léonard F, Kelley R, Withers PJ,  
572 Sherry AH. 2017 A multi-scale correlative investigation of ductile fracture. *Acta*  
573 *Mater.* **130**, 56–68. (doi:10.1016/j.actamat.2017.03.028)
- 574 28. Grandfield K, Engqvist H. 2012 Focused ion beam in the study of biomaterials and  
575 biological matter. *Adv. Mater. Sci. Eng.* **2012**, 1–6. (doi:10.1155/2012/841961)



- 576 29. Mitchell RL, Pleydell-Pearce C, Coleman MP, Davies P, North L, Johnston RE, Harris  
577 W. 2018 Correlative Imaging and Bio-inspiration: Multi-scale and Multi-modal  
578 Investigations of the Acorn Barnacle (*Semibalanus balanoides*). *Microsc. Microanal.*  
579 **24**, 376–377. (doi:10.1017/s1431927618002374)
- 580 30. Mitchell R., Coleman M, Davies P, North L, Pope E., Pleydell-Pearce C, Harris W,  
581 Johnston R. 2019 Macro-to-nano scale investigation of the acorn barnacle *Semibalanus*  
582 *balanoides*: correlative imaging, biological form and function, and bioinspiration. In  
583 *Biorxiv*,
- 584 31. Hayward PJ, Ryland JS. 2017 *Handbook of the marine fauna of north-west Europe*  
585 (*2nd edition*). 2nd edn. Oxford University Press, Oxford.
- 586 32. Gohad N V., Dickinson GH, Orihuela B, Rittschof D, Mount AS. 2009 Visualization  
587 of putative ion-transporting epithelia in *Amphibalanus amphitrite* using correlative  
588 microscopy: Potential function in osmoregulation and biomineralization. *J. Exp. Mar.*  
589 *Bio. Ecol.* **380**, 88–98. (doi:10.1016/j.jembe.2009.09.008)
- 590 33. Anderson DT. 1994 *Barnacles: Structure, Function, Development and Evolution*.  
591 Chapman and Hall, London.
- 592 34. Pilati T, Demartin F, Gramaccioli CM. 1998 Lattice estimation of atomic displacement  
593 parameters in carbonates: calcite and aragonite CaCO<sub>3</sub>, dolomite (CaMg(CO<sub>3</sub>)<sub>2</sub>) and  
594 magnesite MgCO<sub>3</sub>. *Acta Cryst.* **B54**, 515–523.
- 595 35. Gelb J, Finegan DP, Brett DJL, Shearing PR. 2017 Multi-scale 3D investigations of a  
596 commercial 18650 Li-ion battery with correlative electron- and X-ray microscopy. *J.*  
597 *Power Sources* **357**, 77–86. (doi:10.1016/j.jpowsour.2017.04.102)
- 598 36. Harris W. 2015 Multi-scale Correlative Study of Corrosion Evolution in a Magnesium

- 599 Alloy.
- 600 37. Bradley RS, Withers PJ. 2016 Correlative multiscale tomography of biological  
601 materials. *MRS Bull.* **41**, 549–556. (doi:10.1557/mrs.2016.137)
- 602 38. Sykes D, Hartwell R, Bradley RS, Burnett TL, Hornberger B, Garwood RJ, Withers  
603 PJ. 2019 Time-lapse three-dimensional imaging of crack propagation in beetle cuticle.  
604 *Acta Biomater.* **86**, 109–116. (doi:10.1016/j.actbio.2019.01.031)
- 605 39. Bernhardt M *et al.* 2018 Correlative microscopy approach for biology using X-ray  
606 holography, X-ray scanning diffraction and STED microscopy. *Nat. Commun.* **9**, 1–9.  
607 (doi:10.1038/s41467-018-05885-z)
- 608 40. Handschuh S, Baeumler N, Schwaha T, Ruthensteiner B. 2013 A correlative approach  
609 for combining microCT, light and transmission electron microscopy in a single 3D  
610 scenario. *Front. Zool.* **10**, 1–16. (doi:10.1186/1742-9994-10-44)
- 611 41. Liang Y, Zhao Q, Li X, Zhang Z, Ren L. 2016 Study of the microstructure and  
612 mechanical properties of white clam shell. *Micron* **87**, 10–17.  
613 (doi:10.1016/j.micron.2016.04.007)
- 614 42. Okumura T, Suzuki M, Nagasawa H, Kogure T. 2010 Characteristics of biogenic  
615 calcite in the prismatic layer of a pearl oyster, *Pinctada fucata*. *Micron* **41**, 821–826.  
616 (doi:10.1016/j.micron.2010.05.004)
- 617 43. Checa AG, Macías-Sánchez E, Harper EM, Cartwright JHE. 2016 Organic membranes  
618 determine the pattern of the columnar prismatic layer of mollusc shells. *Proc. R. Soc. B*  
619 *Biol. Sci.* **283**. (doi:10.1098/rspb.2016.0032)
- 620 44. Rodriguez-Navarro AB, Checa A, Willinger M-G, Bolmaro R, Bonarski J. 2012  
621 Crystallographic relationships in the crossed lamellar microstructure of the shell of the

- 622 gastropod *Conus marmoreus*. *Acta Biomater.* **8**, 830–835.  
623 (doi:10.1016/j.actbio.2011.11.001)
- 624 45. Weaver JC *et al.* 2012 The Stomatopod Dactyl Club: A formidable damage-tolerant  
625 biological hammer. *Science* **336**, 1275–1280. (doi:10.1126/science.1218764)
- 626 46. Falini G, Albeck S, Weiner S, Addadi L. 1996 Control of Aragonite or Calcite  
627 Polymorphism by Mollusk Shell Macromolecules. *Science.* **271**, 67–69.
- 628 47. Zhou GT, Yao QZ, Ni J, Jin G. 2009 Formation of aragonite mesocrystals and  
629 implication for biomineralization. *Am. Mineral.* **94**, 293–302.  
630 (doi:10.2138/am.2009.2957)
- 631 48. Gale A. 2018 Stalked barnacles (Cirripedia, Thoracica) from the Upper Jurassic  
632 (Tithonian) Kimmeridge Clay of Dorset, UK; palaeoecology and bearing on the  
633 evolution of living forms. *Proc. Geol. Assoc.* , 1–11.  
634 (doi:10.1016/j.pgeola.2018.01.005)
- 635 49. Pérez-Losada M, Harp M, Høeg JT, Achituv Y, Jones D, Watanabe H, Crandall KA.  
636 2008 The tempo and mode of barnacle evolution. *Mol. Phylogenet. Evol.* **46**, 328–346.  
637 (doi:10.1016/j.ympev.2007.10.004)
- 638 50. Lowenstam HA, Weiner S. 1992 Phosphatic shell plate of the barnacle *Ibla*  
639 (Cirripedia): a bone-like structure. *Proc. Natl. Acad. Sci.* **89**, 10573–10577.  
640 (doi:10.1073/pnas.89.22.10573)
- 641 51. Checa AG, Jiménez-López C, Rodríguez-Navarro A, Machado JP. 2007 Precipitation  
642 of aragonite by calcitic bivalves in Mg-enriched marine waters. *Mar. Biol.* **150**, 819–  
643 827. (doi:10.1007/s00227-006-0411-4)
- 644 52. Hockett D, Ingram P, LeFurgey A. 1997 Strontium and manganese uptake in the

- 645 barnacle shell: Electron probe microanalysis imaging to attain fine temporal resolution  
646 of biomineralization activity. *Mar. Environ. Res.* **43**, 131–143. (doi:10.1016/0141-  
647 1136(96)00081-5)
- 648 53. Rodriguez-Navarro AB, CabraldeMelo C, Batista N, Morimoto N, Alvarez-Lloret P,  
649 Ortega-Huertas M, Fuenzalida VM, Arias JI, Wiff JP. 2006 Microstructure and  
650 crystallographic-texture of giant barnacle (*Austromegabalanus psittacus*) shell. *J.*  
651 *Struct. Biol.* **156**, 355–362. (doi:10.1016/j.jsb.2006.04.009)
- 652 54. Arias JL, Neira-Carrillo A, Arias JI, Escobar C, Boderio M, David M, Fernández MS.  
653 2004 Sulfated polymers in biological mineralization: A plausible source for bio-  
654 inspired engineering. *J. Mater. Chem.* **14**, 2154–2160. (doi:10.1039/b401396d)
- 655 55. Bezares J, Asaro RJ, Hawley M. 2010 Macromolecular structure of the organic  
656 framework of nacre in *Haliotis rufescens*: Implications for mechanical response. *J.*  
657 *Struct. Biol.* **170**, 484–500. (doi:10.1016/j.jsb.2010.01.006)
- 658 56. Heß M, Beck F, Gensler H, Kano Y, Kiel S, Haszprunar G. 2008 Microanatomy, shell  
659 structure and molecular phylogeny of *Leptogyra*, *Xyleptogyra* and *Leptogyropsis*  
660 (Gastropoda: Neomphalida: Melanodrymiidae) from sunken wood. *J. Molluscan Stud.*  
661 **74**, 383–401. (doi:10.1093/mollus/eyn030)
- 662 57. Reindl S, Haszprunar G. 1994 Light and electron microscopical investigations on shell  
663 pores (caeca) of fissurellid limpets (Mollusca: Archaeogastropoda). *J. Zool. Soc.*  
664 *London* **233**, 385–404. (doi:10.1111/j.1469-7998.1994.tb05272.x)
- 665 58. Gries K, Kröger R, Kübel C, Fritz M, Rosenauer A. 2009 Investigations of voids in the  
666 aragonite platelets of nacre. *Acta Biomater.* **5**, 3038–3044.  
667 (doi:10.1016/j.actbio.2009.04.017)

- 668 59. Meyers MA, Lim CT, Li A, Hairul Nizam BR, Tan EPS, Seki Y, McKittrick J. 2009  
669 The role of organic intertile layer in abalone nacre. *Mater. Sci. Eng. C* **29**, 2398–2410.  
670 (doi:10.1016/j.msec.2009.07.005)
- 671 60. Pentcheff ND. 1991 Resistance to crushing from wave-borne debris in the barnacle  
672 *Balanus glandula*. *Mar. Biol.* **110**, 399–408. (doi:10.1007/BF01344359)
- 673 61. Lively CM. 2006 Predator-Induced Shell Dimorphism in the Acorn Barnacle  
674 *Chthamalus anisopoma*. *Evolution* **40**, 232–242. (doi:10.2307/2408804)
- 675 62. Bertness MD, Gaines SD, Yeh SM. 1998 Making mountains out of barnacles: The  
676 dynamics of acorn barnacle hummocking. *Ecology* **79**, 1382–1394. (doi:DOI:  
677 10.2307/176750)
- 678 63. Quan H, Yang W, Schaible E, Ritchie RO, Meyers MA. 2018 Novel Defense  
679 Mechanisms in the Armor of the Scales of the “Living Fossil” Coelacanth Fish. *Adv.*  
680 *Funct. Mater.* **28**, 1804237. (doi:10.1002/adfm.201804237)
- 681 64. Li XW, Ji HM, Yang W, Zhang GP, Chen DL. 2017 Mechanical properties of crossed-  
682 lamellar structures in biological shells: A review. *J. Mech. Behav. Biomed. Mater.* **74**,  
683 54–71. (doi:10.1016/j.jmbbm.2017.05.022)
- 684 65. Liu Z, Meyers MA, Zhang Z, Ritchie RO. 2017 Functional gradients and  
685 heterogeneities in biological materials: Design principles, functions, and bioinspired  
686 applications. *Prog. Mater. Sci.* **88**, 467–498. (doi:10.1016/j.pmatsci.2017.04.013)
- 687 66. Liu Z, Zhu Y, Jiao D, Weng Z, Zhang Z, Ritchie RO. 2016 Enhanced protective role in  
688 materials with gradient structural orientations: Lessons from Nature. *Acta Biomater.*  
689 **44**, 31–40. (doi:10.1016/j.actbio.2016.08.005)
- 690 67. Lopez MI, Meza Martinez PE, Meyers MA. 2014 Organic interlamellar layers,

- 691 mesolayers and mineral nanobridges: Contribution to strength in abalone (*Haliotis*  
692 *rufescence*) nacre. *Acta Biomater.* **10**, 2056–2064. (doi:10.1016/j.actbio.2013.12.016)
- 693 68. Wilkerson RP, Gludovatz B, Ell J, Watts J, Hilmas GE, Ritchie RO. 2019 High-  
694 temperature damage-tolerance of coextruded, bioinspired (“nacre-like”),  
695 alumina/nickel compliant-phase ceramics. *Scr. Mater.* **158**, 110–115.  
696 (doi:10.1016/j.scriptamat.2018.08.046)
- 697 69. Cao SC, Liu J, Zhu L, Li L, Dao M, Lu J, Ritchie RO. 2018 Nature-Inspired  
698 Hierarchical Steels. *Sci. Rep.* **8**, 1–7. (doi:10.1038/s41598-018-23358-7)
- 699 70. Green KA, Pollock. TM, Harada TE, Howson RC, Reed. JJ, Chirra., Walston. S. 2004  
700 *Superalloys 2004*. TMS (The Minerals, Metals and Materials Society).
- 701 71. Mitchell RJ, Lemsky JA, Ramanathan R, Li HY, Perkins KM, Connor LD. 2008  
702 Process Development & Microstructure & Mechanical Property Evaluation of a Dual  
703 Microstructure Heat Treated Advanced Nickel Disc Alloy. In *Superalloys 2008* (eds R  
704 Reed, K Green, P Caron, T Gabb, M Fahrman, E Huron, SA Woodard), pp. 347–356.
- 705 72. Mitchell RJ. 2010 Polycrystalline Nickel-Based Superalloys: Processing, Performance,  
706 and Application. *Encycl. Aerosp. Eng.* , 1–12. (doi:10.1002/9780470686652.eae217)
- 707 73. Loh GH, Pei E, Harrison D, Monzón MD. 2018 An overview of functionally graded  
708 additive manufacturing. *Addit. Manuf.* **23**, 34–44. (doi:10.1016/j.addma.2018.06.023)

## 709 **11. Figure captions**

710 **Figure 1:** Morphological structure of the barnacle *Semibalanus balanoides*. (a) Transverse  
711 view of the six wall plates composing the barnacle conical structure. Alae between adjacent  
712 wall plates are highlighted by red arrows, radius on neighbouring plates by black. (b)

713 Longitudinal internal view through adjacent wall plates. Inserts illustrate morphological  
714 differences of the ala at different points of the interlock. B adapted from [13].

715

716 **Figure 2:** Schematic of the multi-modal and multi-scale correlative workflow utilising LM,  
717 XRM, SEM, AND FIB-SEM. These techniques can be correlated using Zeiss Microscopy  
718 Atlas 5 (3D) software.

719

720 **Figure 3:** Stages of the FIB-SEM automated milling process using Zeiss Microscopy Atlas 5  
721 (3D). (a) An overlay is created for each part of the milling preparation. (b) Once a platinum  
722 pad has been deposited over an initial platinum pad and the milled reference marks creating a  
723 ‘sandwich’, a trench is milled to reveal a cross section face (c). (d) Acquired images can then  
724 be stacked together to create a tomographic volume.

725

726 **Figure 4:** SEM imaging and EBSD crystallography of the barnacle and ala. (a) Scanning  
727 electron microscope (SEM) image of an individual barnacle in transverse section. (b) View of  
728 three interlocking plates and ala (red arrows). (c-d) Close up of two ala (insert boxes in b),  
729 revealing micro-structure transverse banding and perpendicular elongated grooves/channels  
730 at the tip. (e-f) Electron backscattered diffraction (EBSD) maps of ala in c-d, illustrating  
731 elongated grain orientations at the tip of the ala, and granular grains behind the tip and on the  
732 adjacent plate. Blue arrow illustrates inside edge coarse grains. Elongated grains appear to  
733 correlate with porous area of ala. Scales in e and f correspond to c and d, respectively.

734

735 **Figure 5:** XRM of the barnacle. *(a, i)* 3D XRM image of the barnacle. *(ii)* XRM reveals  
736 changes in the morphology of the ala through its length. Also indicated are the directions  
737 upon which the ala meets the neighbouring plate (yellow arrows). Also identified are pore  
738 networks, and how these change through the ala length *(iii, iv)*. *(b)* Segmented XRM ala  
739 pores *(i-iii)*. From local thickness analysis in Fiji, pores appear to be thickest on the inside-  
740 edge of the plate, nearest the soft body of the organism. Purple = thin, yellow = thick. *(iv)*  
741 Simplified illustration showing the change in pore geometry through the length of the ala; the  
742 pores (blue lines) are parallel to the direction of the ala which continues down the ala length.  
743 Once at the ala sutural edge, the pores change direction, instead running from top to bottom  
744 (direction illustrated by red arrows). Thick blue lines indicate areas of thickening. Image  
745 reconstructions occurred in Drishti *(a)* and ORS Dragonfly *(b)*. Segmentation of pores  
746 occurred in Zeiss Microscopy Intellesis software. Pore thickness map produced by Local  
747 Thickness plugin in Fiji/ImageJ software.

748

749 **Figure 6:** *(a)* Locations of milled volumes on the ala and opposing plate. *(b, c)* Reconstructed  
750 and segmented pore volumes on the opposing plate, illustrating a  $17/197^\circ$  orientation. *(d, e)*  
751 Reconstructed and segmented pore volumes on the ala, illustrating a  $105/285^\circ$  orientation. *(f-*  
752 *i)* Histograms highlighting statistical variations in the pores between the ala and opposing  
753 plate.

754

755 **Figure 7:** Correlation of 2D and 3D over macro-micro-nano scales and multi-modes to  
756 inform about barnacle exoskeleton morphology.

757 **Supplementary material 1:** Data for ala porosity analysis, generated from FIB-SEM  
758 imaging.



759 **Supplementary material 2:** Video illustrating the 3D structure of the barnacle and the  
760 adjoining wall-plates, generated from XRM. Rendered in Drishti.

761 **Supplementary material 3:** Video illustrating the pore networks in the ala; data generating  
762 from FIB-SEM imaging. Rendered in ORS Dragonfly.

763 **Supplementary material 4:** Video illustrating the pore networks in the opposing plate to the  
764 ala; data generating from FIB-SEM imaging. Rendered in ORS Dragonfly.

765

# Correlative workflow

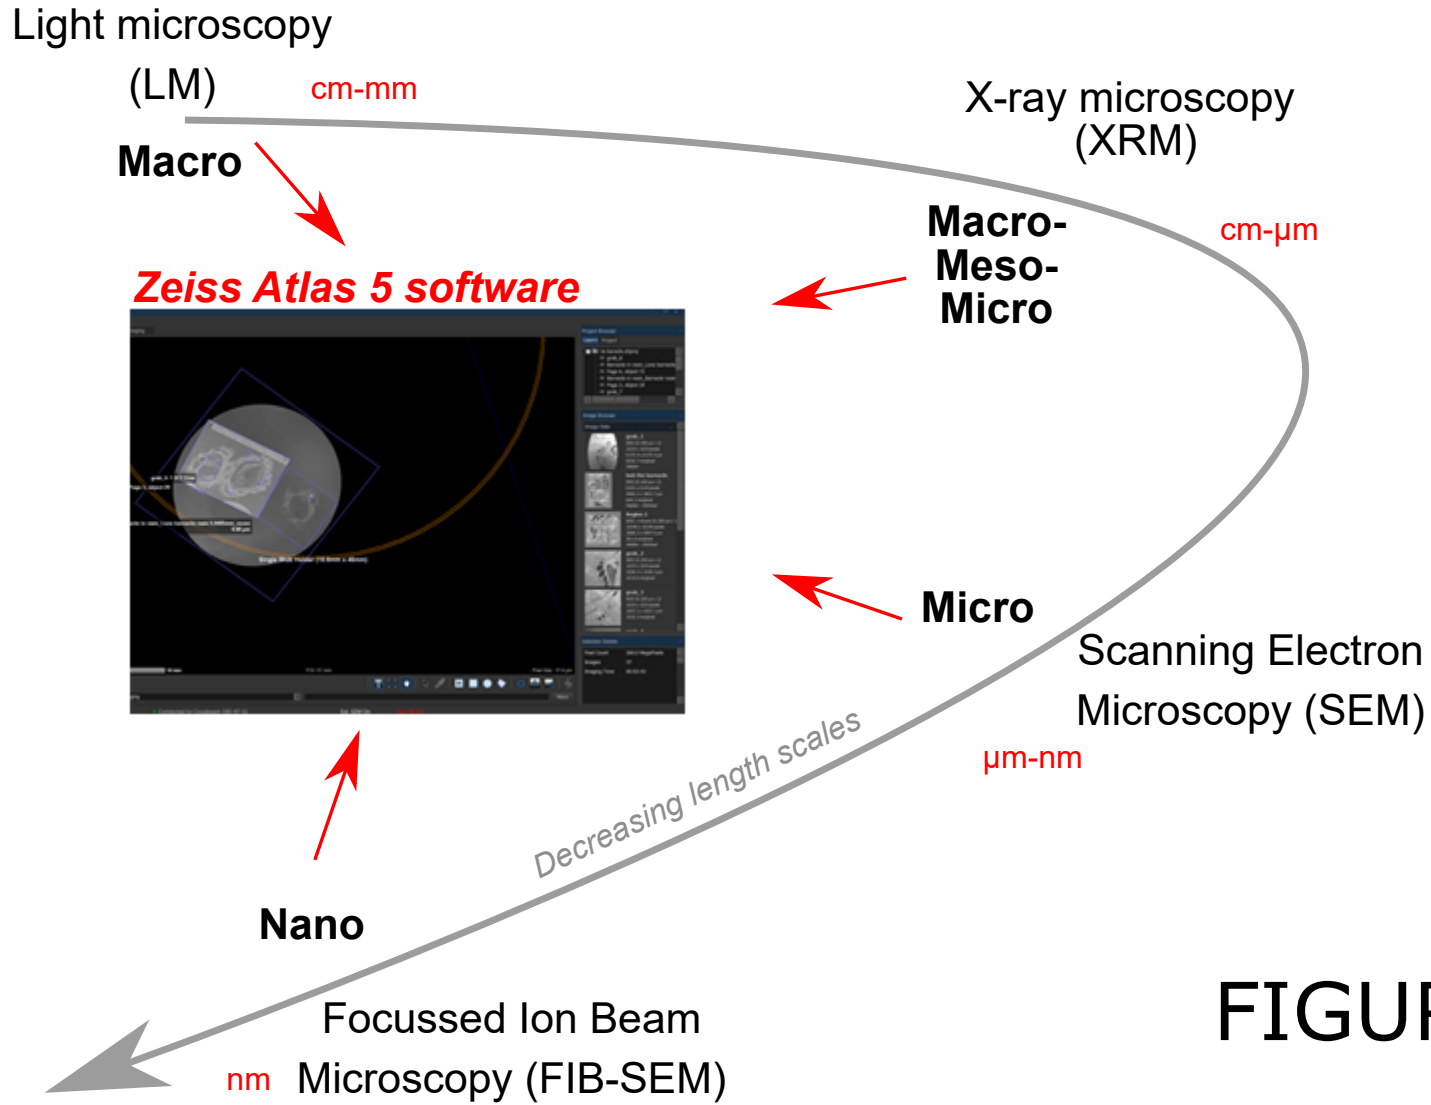

**FIGURE 2**

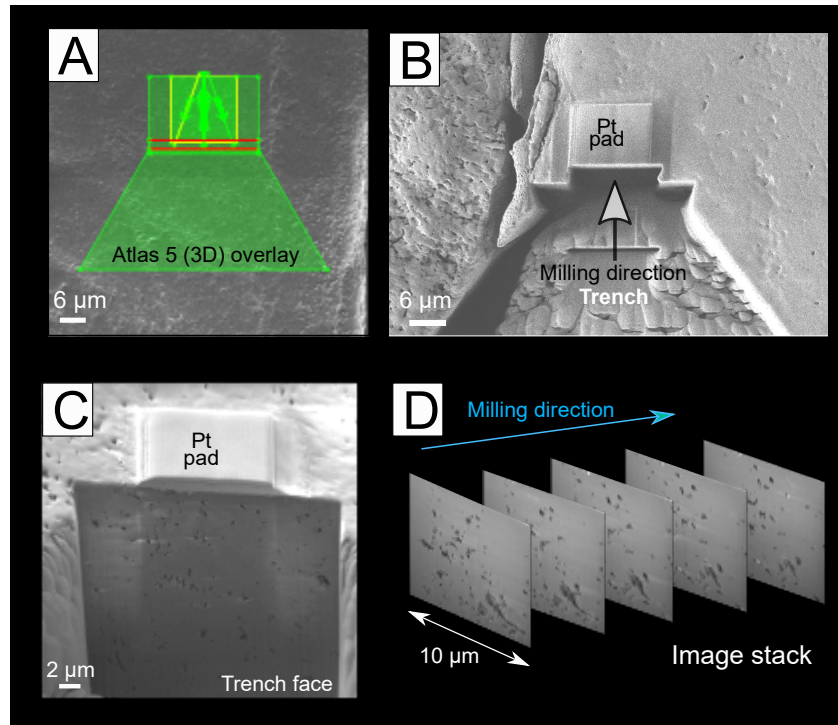

FIGURE 3

C

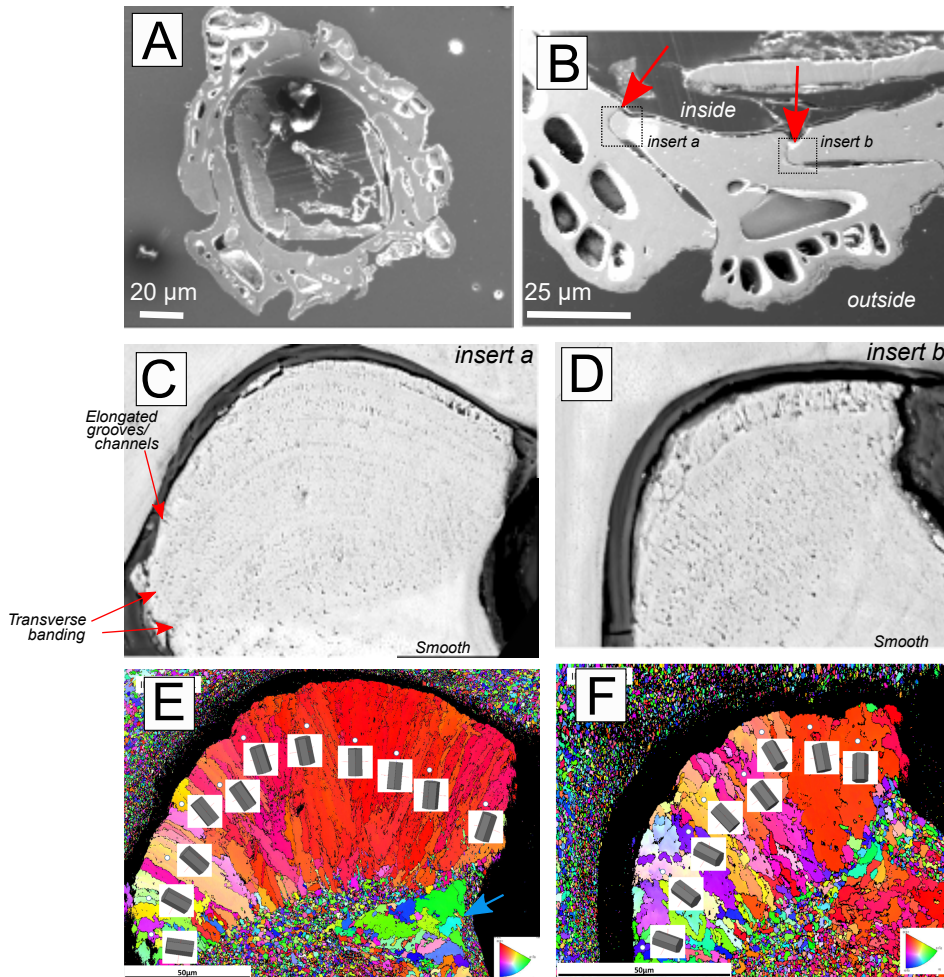

FIGURE 4

# A CT of barnacle ala

bioRxiv preprint doi: <https://doi.org/10.1101/590158>; this version posted May 15, 2019. The copyright holder for this preprint (which was not certified by peer review) is the author/funder, who has granted bioRxiv a license to display the preprint in perpetuity. It is made available under aCC-BY 4.0 International license.

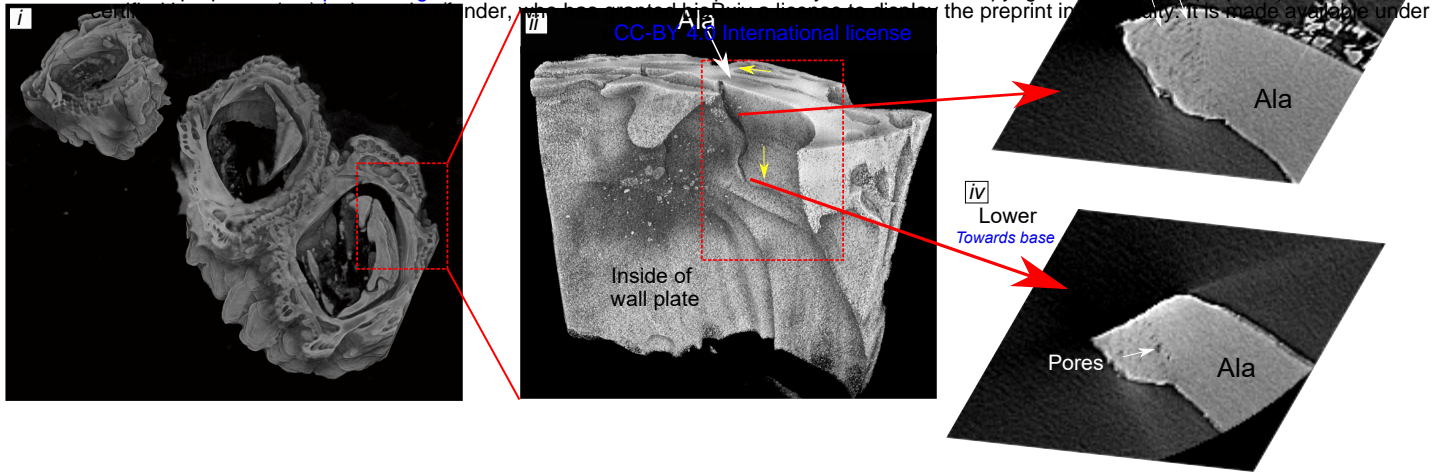

# B Segmented pores

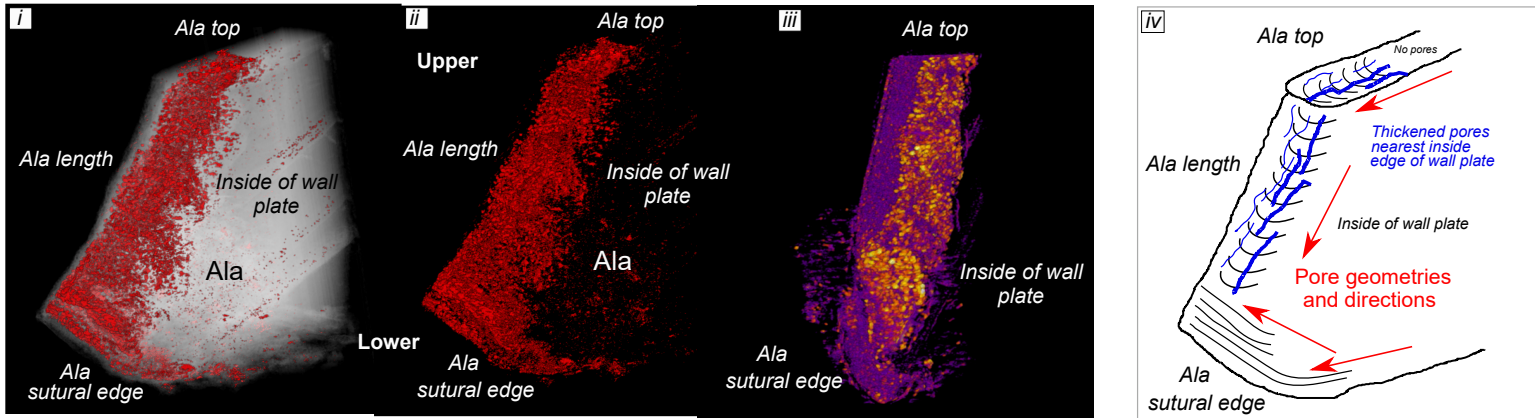

FIGURE 5

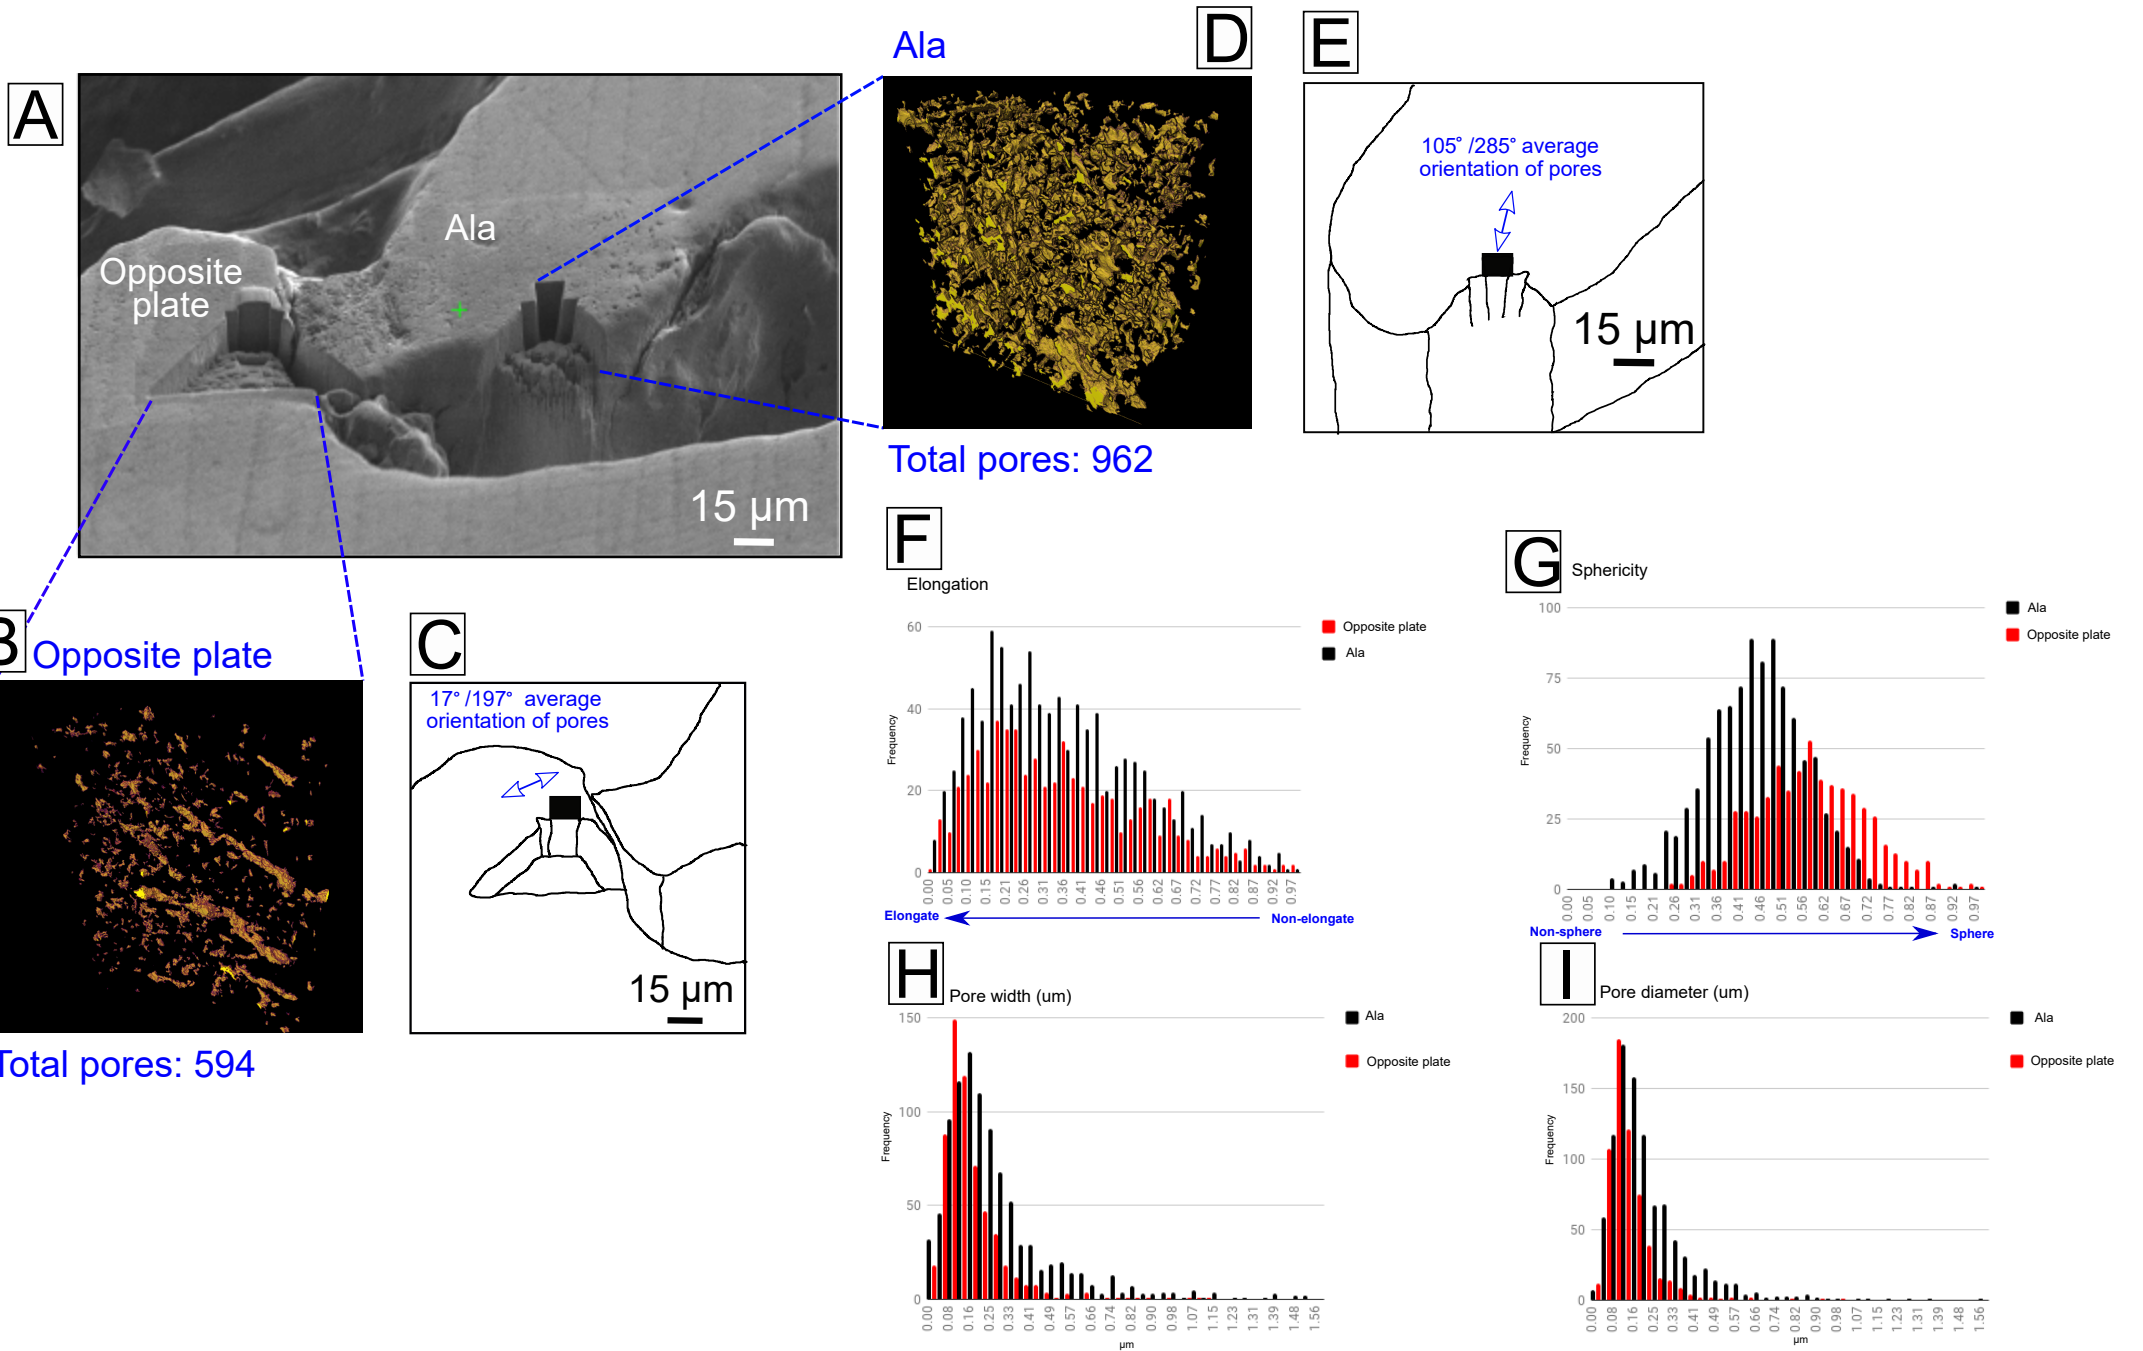

**FIGURE 6**

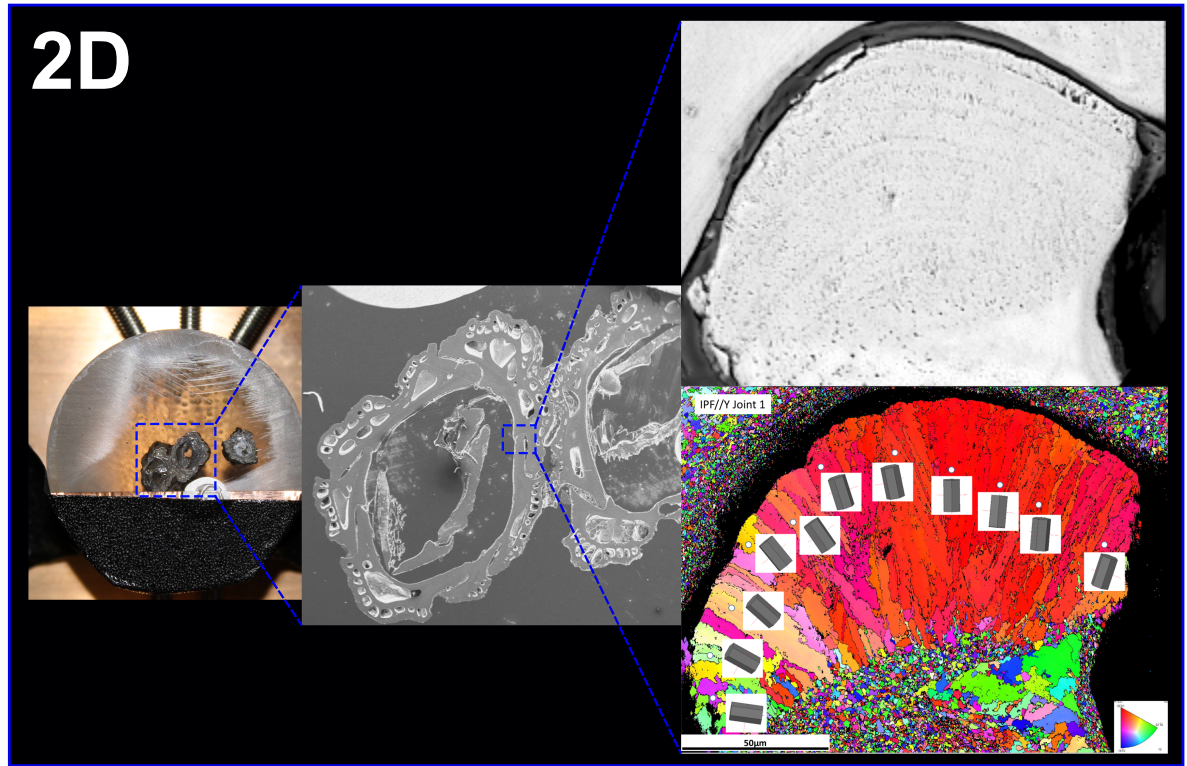

Figure 7

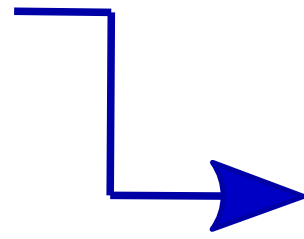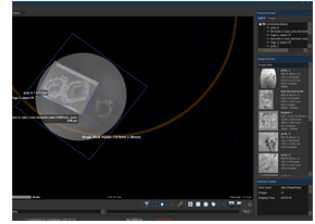

**Correlation  
via  
Atlas 5  
and  
ZEN Connect**

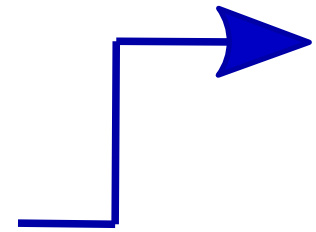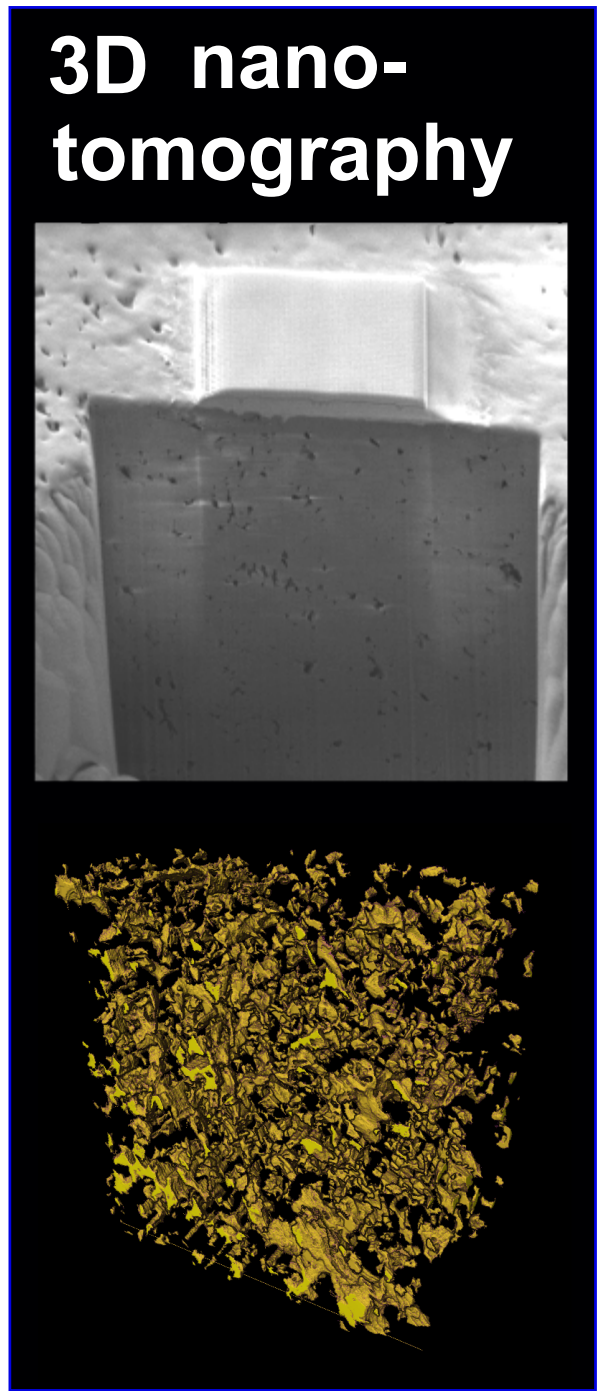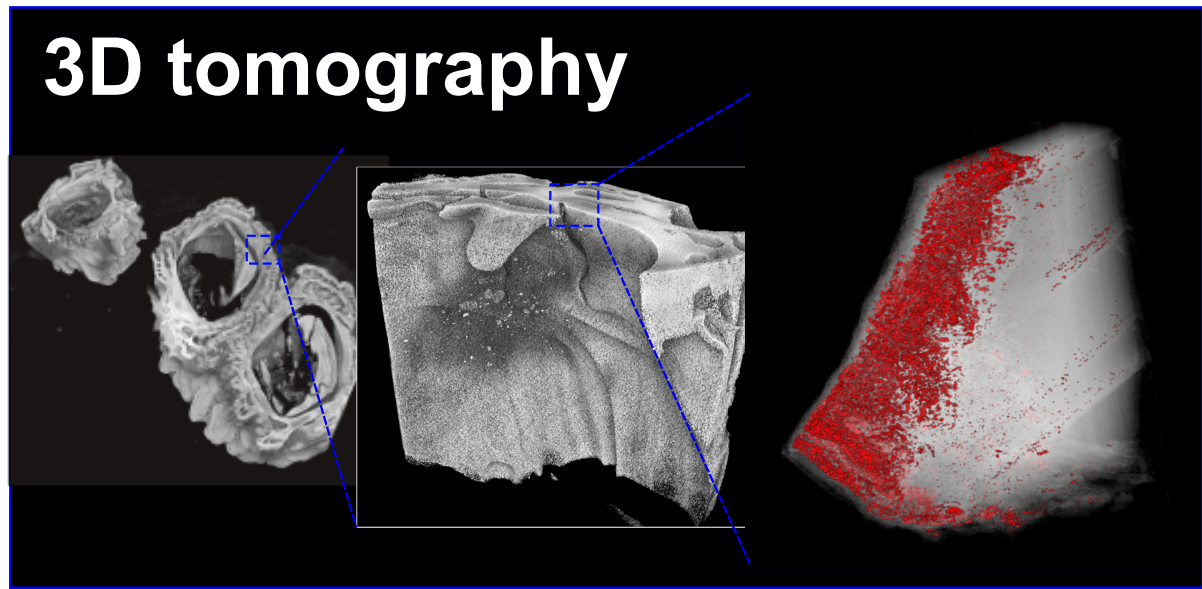

*Macro*

*Micro*

*Nano*

**A****Transverse view**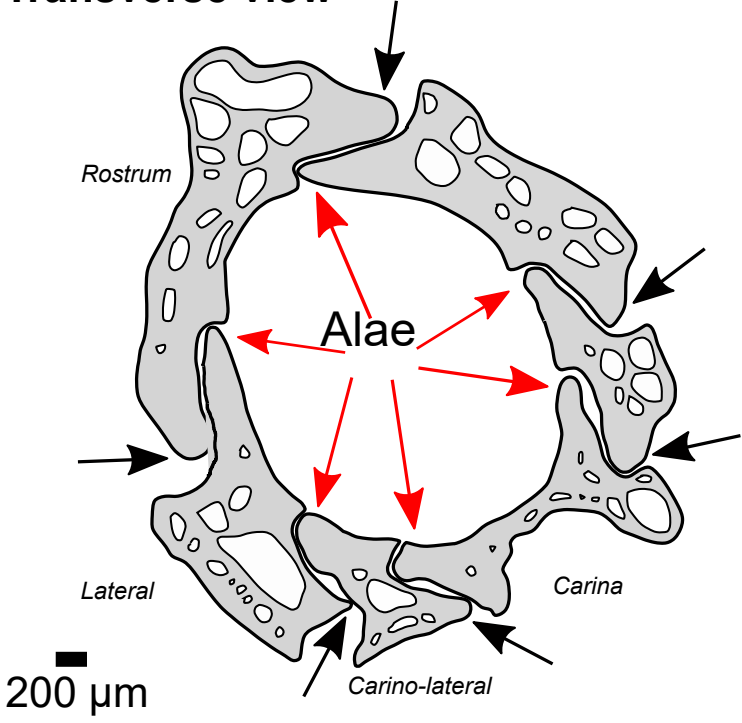**B****Longitudinal view**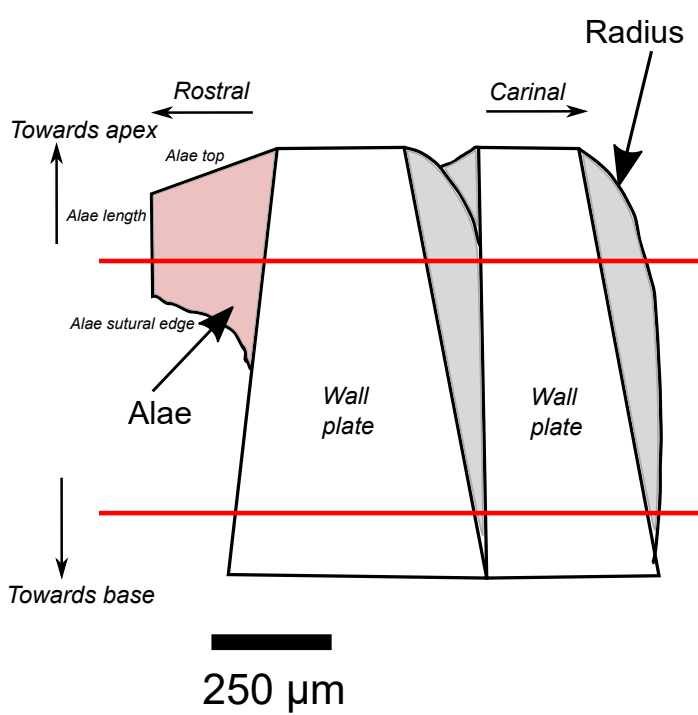

Transverse views at different levels of barnacle cone

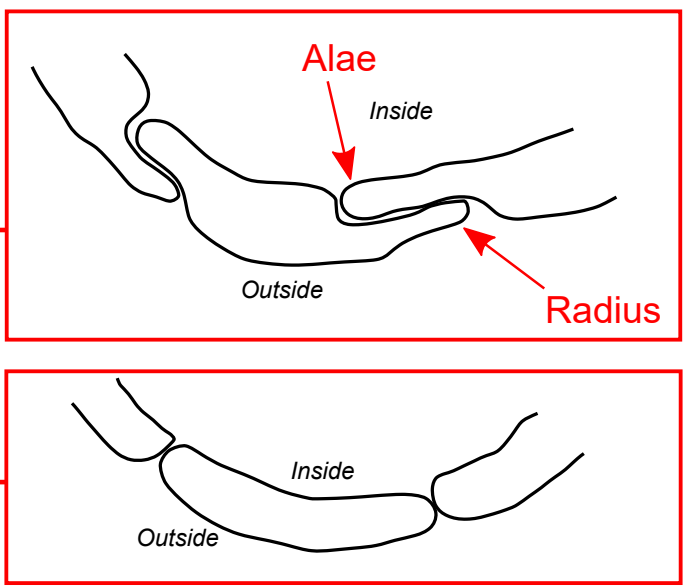**FIGURE 1**
